# Supplementary material for: Roles of Suaeda vermiculata Aqueous‐Ethanolic Extract, Its Subsequent Fractions, and the Isolated Compounds in Hepatoprotection against Paracetamol‐Induced Toxicity as Compared to Silymarin
Source: Hindawi journal article supplement (doi:10.1155/2021/6174897), 2021-01-01

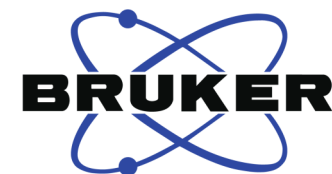

Current Data Parameters  
NAME msh-HC  
EXPNO 2  
PROCNO 1

F2 - Acquisition Parameters  
Date\_ 20200901  
Time 8.41  
INSTRUM spect  
PROBHD 5 mm PABBO BB/  
PULPROG jmod  
TD 65536  
SOLVENT MeOD  
NS 14329  
DS 4  
SWH 24038.461 Hz  
FIDRES 0.366798 Hz  
AQ 1.3631488 sec  
RG 205.37  
DW 20.800 usec  
DE 6.50 usec  
TE 300.0 K  
CNST2 145.000000  
CNST11 1.0000000  
D1 2.00000000 sec  
D20 0.00689655 sec  
TD0 1

===== CHANNEL f1 =====  
SFO1 100.6278593 MHz  
NUC1 13C  
P1 10.00 usec  
P2 20.00 usec  
PLW1 47.00000000 W

===== CHANNEL f2 =====  
SFO2 400.1516006 MHz  
NUC2 1H  
CPDPRG[2] waltz16  
PCPD2 90.00 usec  
PLW2 18.00000000 W  
PLW12 0.34722000 W

F2 - Processing parameters  
SI 32768  
SF 100.6177975 MHz  
WDW EM  
SSB 0  
LB 1.00 Hz  
GB 0  
PC 1.40

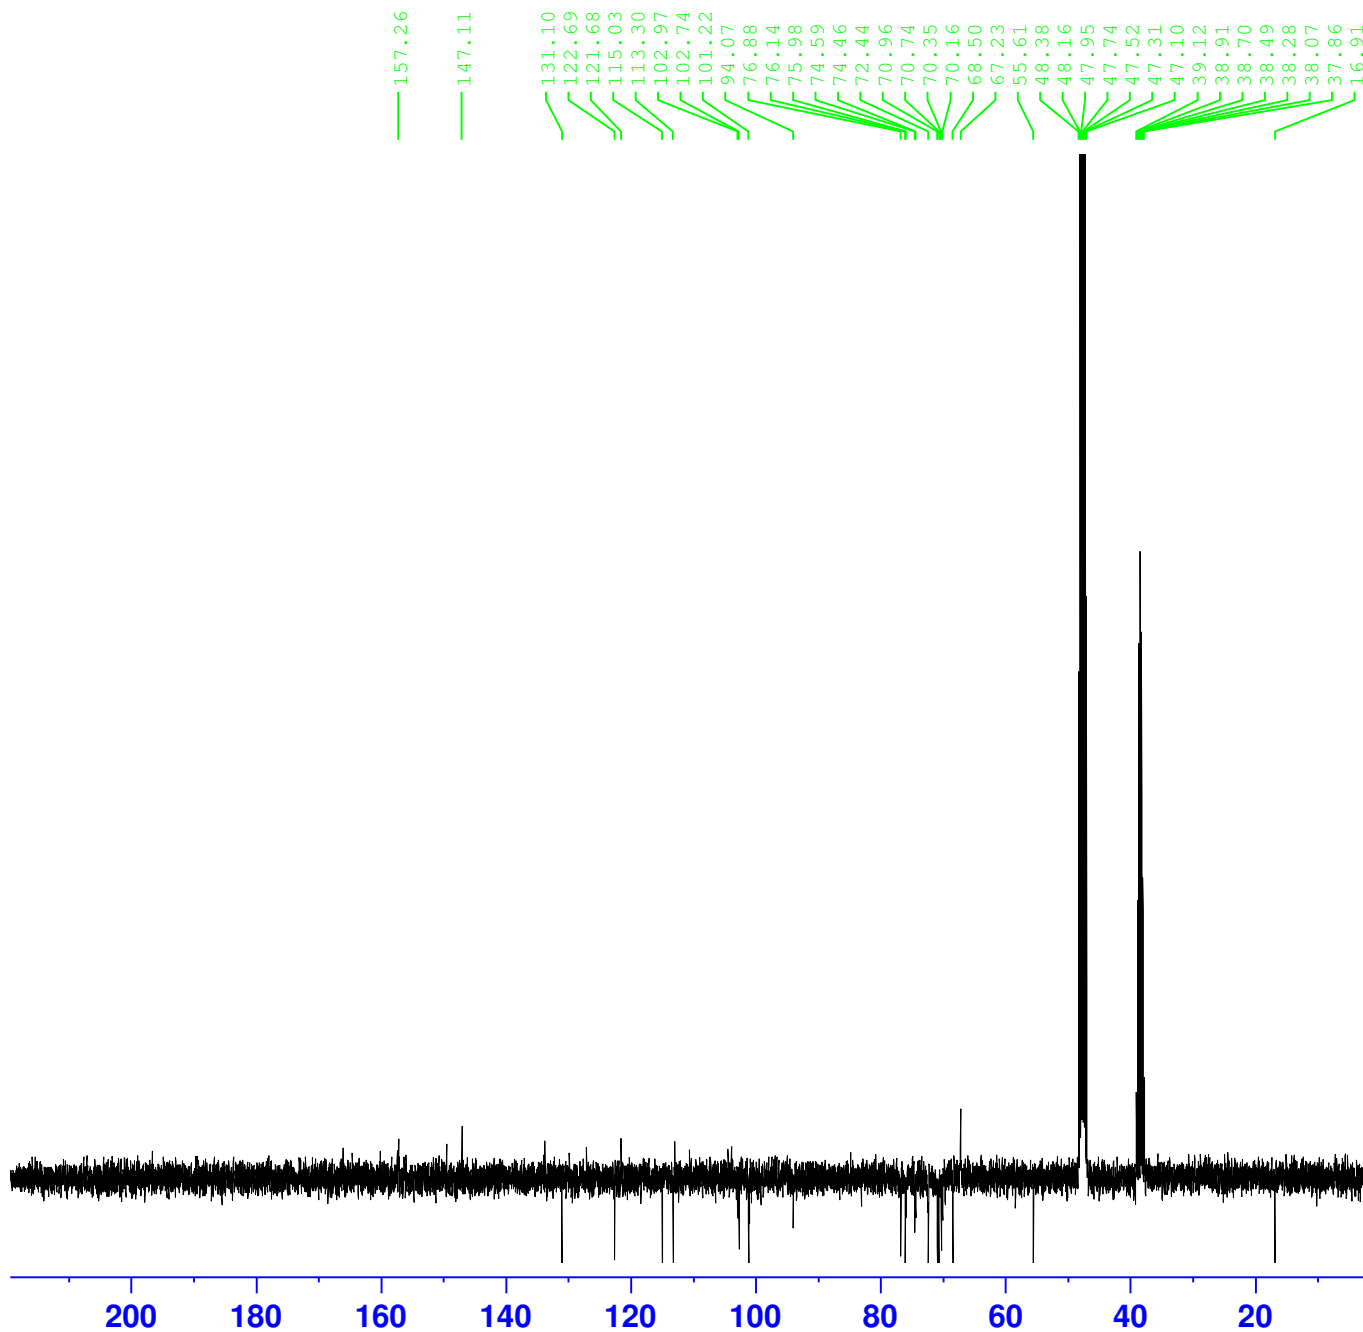

Supplement: f1 [file 6174897.f1.zip]
