# Supplementary material for: Roles of Suaeda vermiculata Aqueous‐Ethanolic Extract, Its Subsequent Fractions, and the Isolated Compounds in Hepatoprotection against Paracetamol‐Induced Toxicity as Compared to Silymarin
Source: Hindawi journal article supplement (doi:10.1155/2021/6174897), 2021-01-01
Supplement: f1 [file 6174897.f1.zip]

145.4622  
143.0261  
38.  
36.501  
29  
22.9879  
53.0343  
51.3996  
50.3609  
40.01  
39.5832  
37.61  
37.5483  
37.4854  
36.8692  
32.9829  
32.8397  
32.1509  
31.4384  
29.9225  
29.5802  
29.3176  
28.1836  
27.4306  
25.2190  
24.9869  
24.6387  
23.2836  
22.9164  
22.8291  
19.9352  
19.8704  
17.6190  
16.4979  
14.3261  
12.3089  
11.4646  
1.2417
