# Supplementary material for: Roles of Suaeda vermiculata Aqueous‐Ethanolic Extract, Its Subsequent Fractions, and the Isolated Compounds in Hepatoprotection against Paracetamol‐Induced Toxicity as Compared to Silymarin
Source: Hindawi journal article supplement (doi:10.1155/2021/6174897), 2021-01-01

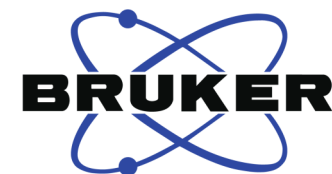

Current Data Parameters  
NAME msh-H1  
EXPNO 1  
PROCNO 1

F2 - Acquisition Parameters  
Date\_ 20200716  
Time 8.16  
INSTRUM spect  
PROBHD 5 mm PABBO BB/  
PULPROG zg30  
TD 65536  
SOLVENT MeOD  
NS 128  
DS 2  
SWH 8012.820 Hz  
FIDRES 0.122266 Hz  
AQ 4.0894465 sec  
RG 205.37  
DW 62.400 usec  
DE 6.50 usec  
TE 300.0 K  
D1 1.00000000 sec  
TD0 1

===== CHANNEL f1 =====  
SFO1 400.1524711 MHz  
NUC1 1H  
P1 12.00 usec  
PLW1 18.00000000 W

F2 - Processing parameters  
SI 65536  
SF 400.1500000 MHz  
WDW EM  
SSB 0  
LB 0.30 Hz  
GB 0  
PC 1.00

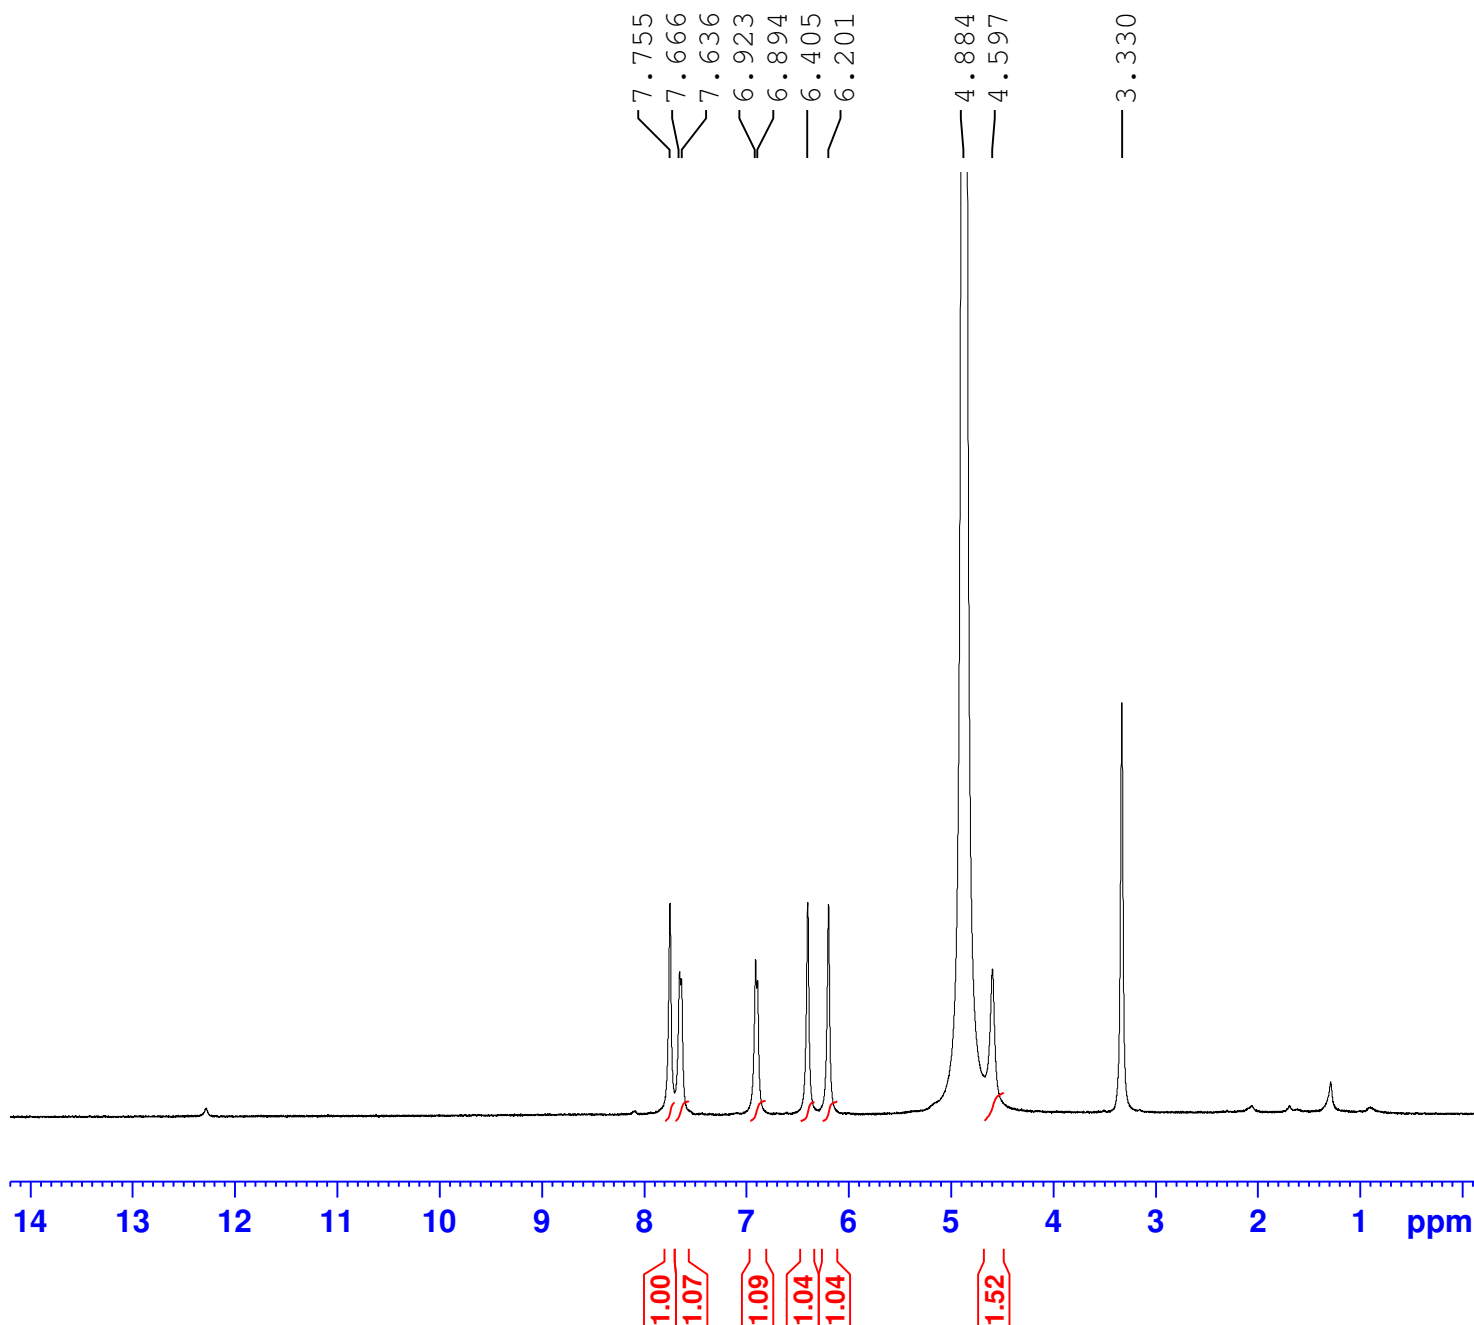

Supplement: f1 [file 6174897.f1.zip]
