# Supplementary figures and images for: Roles of Suaeda vermiculata Aqueous‐Ethanolic Extract, Its Subsequent Fractions, and the Isolated Compounds in Hepatoprotection against Paracetamol‐Induced Toxicity as Compared to Silymarin
Source: Hindawi journal article supplement (doi:10.1155/2021/6174897), 2021-01-01

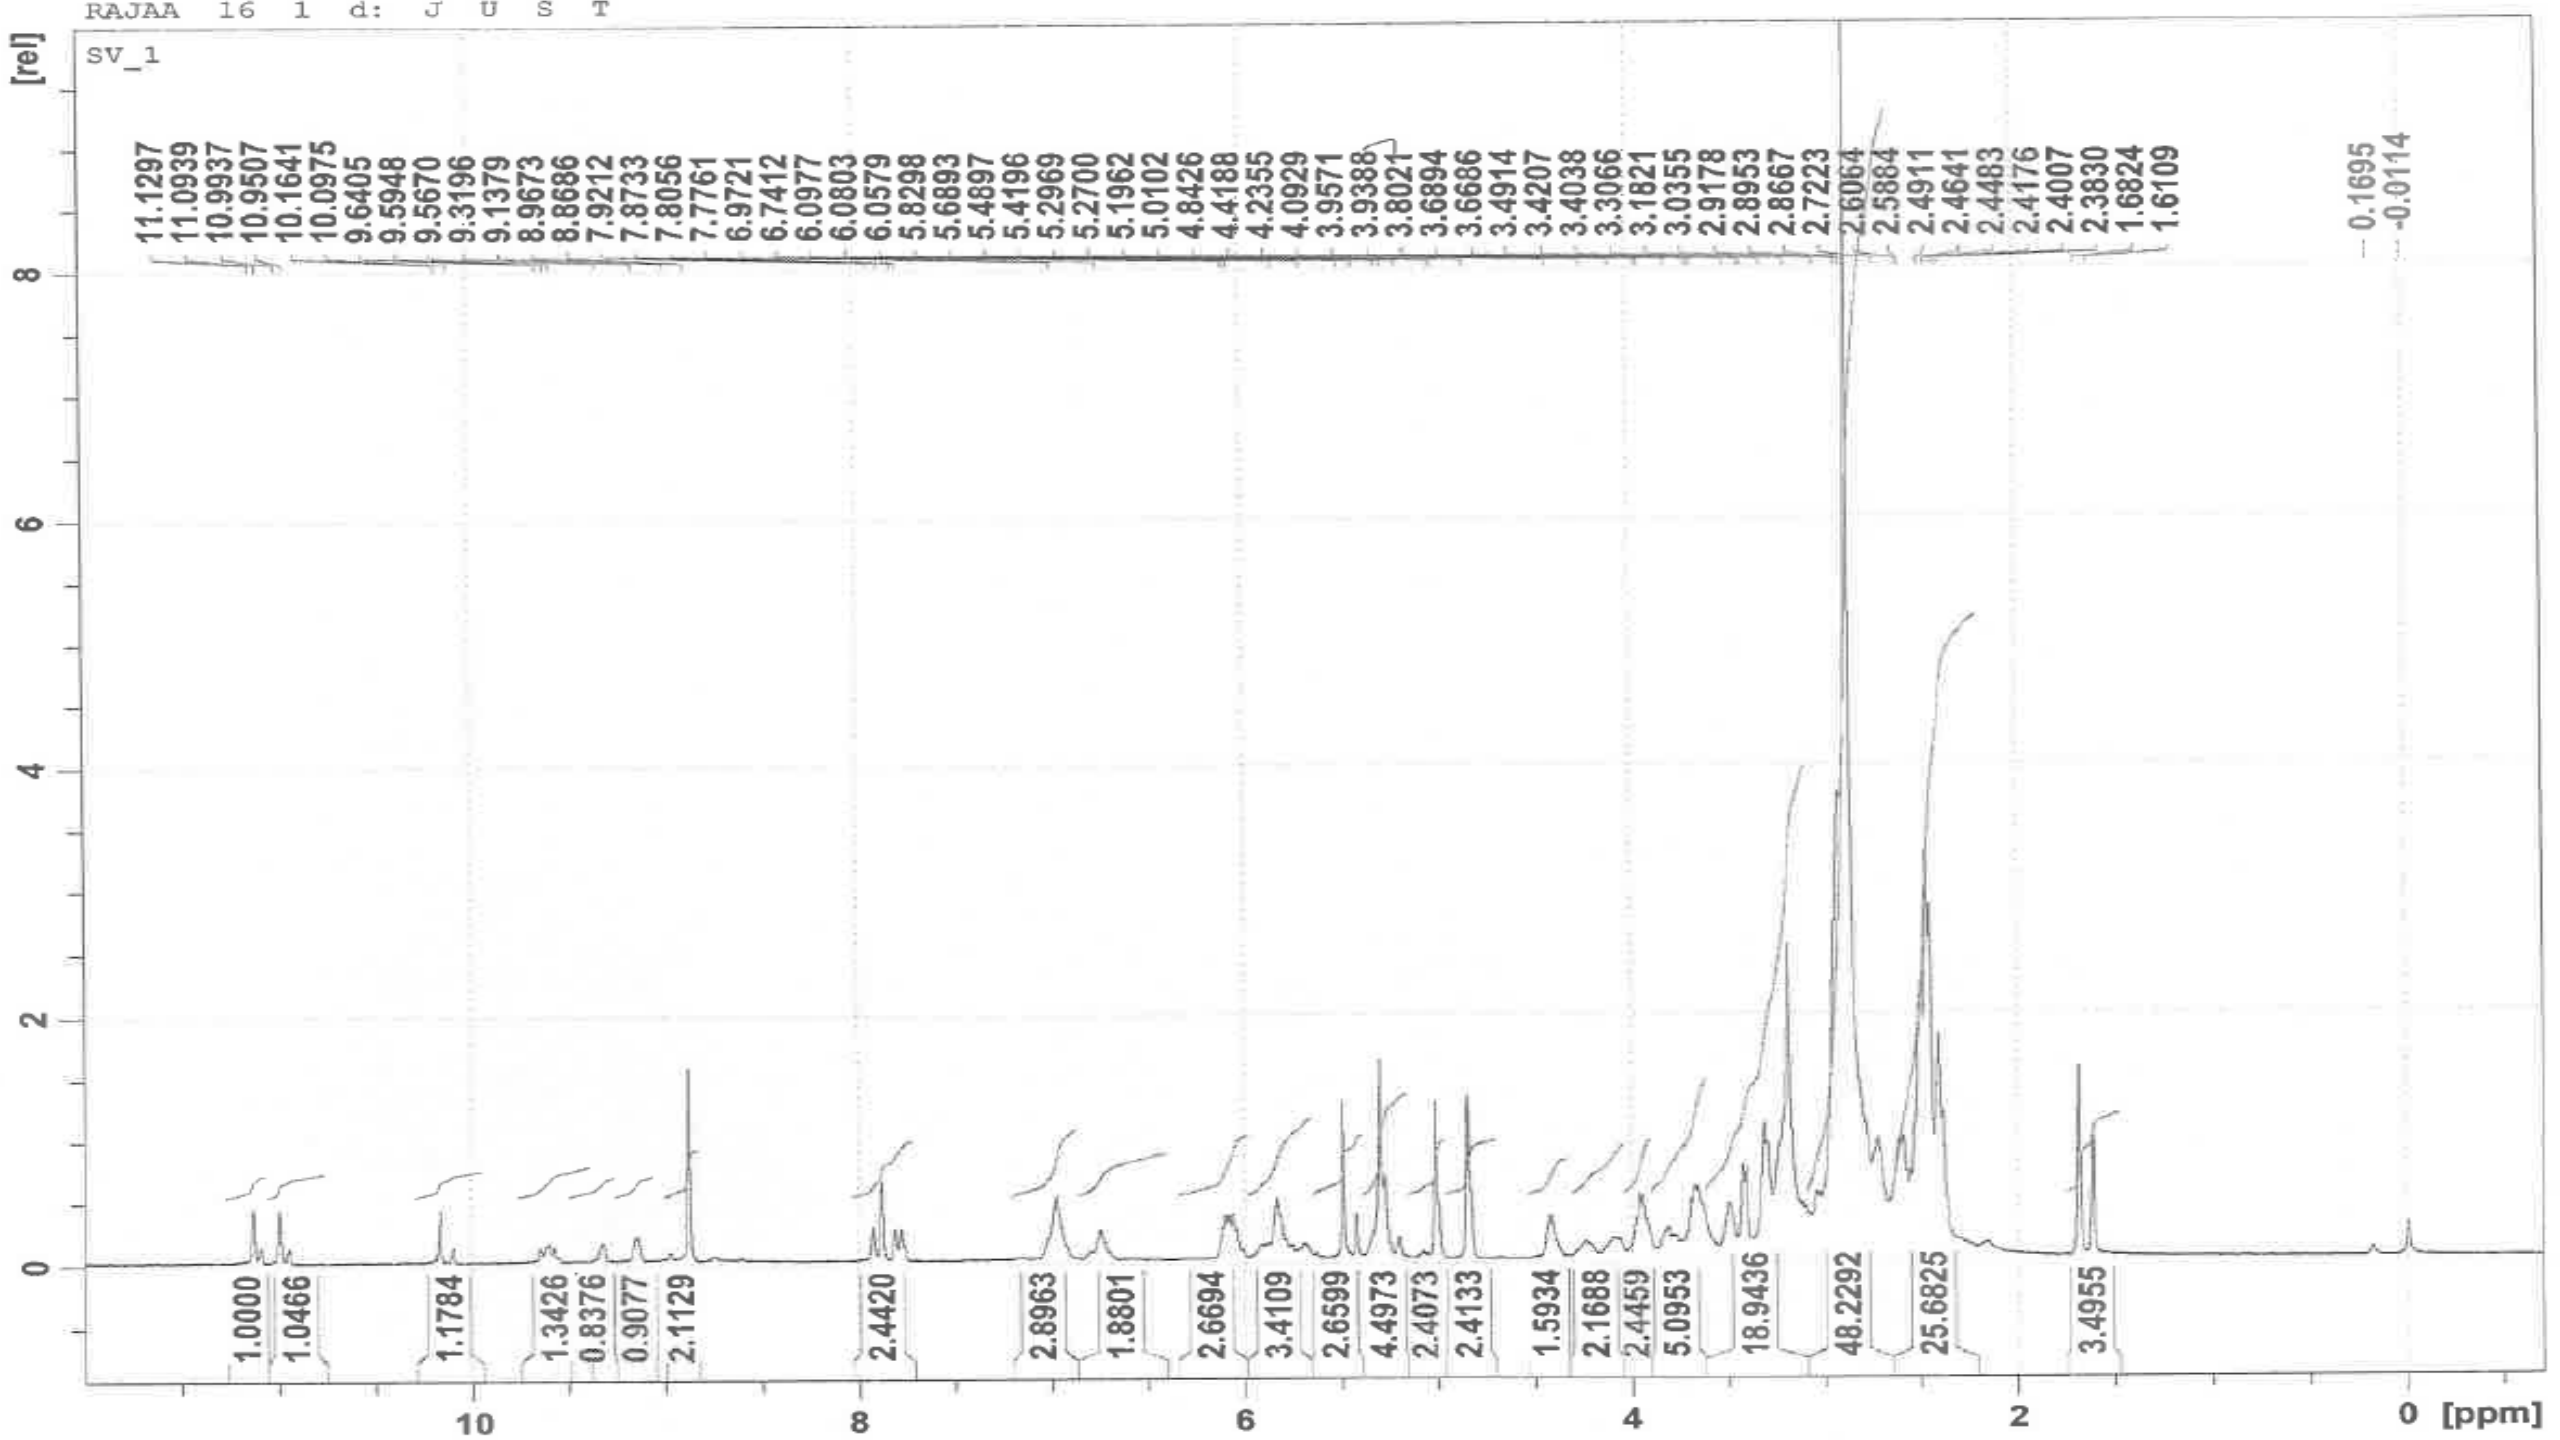

Supplement: f1 [file 6174897.f1.zip]

6-3\_200315221502#1164-1203 RT: 31.03-32.07 AV: 40 SB: 2 35.83, 31.22 NL: 1.07E7

T: FTMS+pESI Full ms [100.00-2000.00]

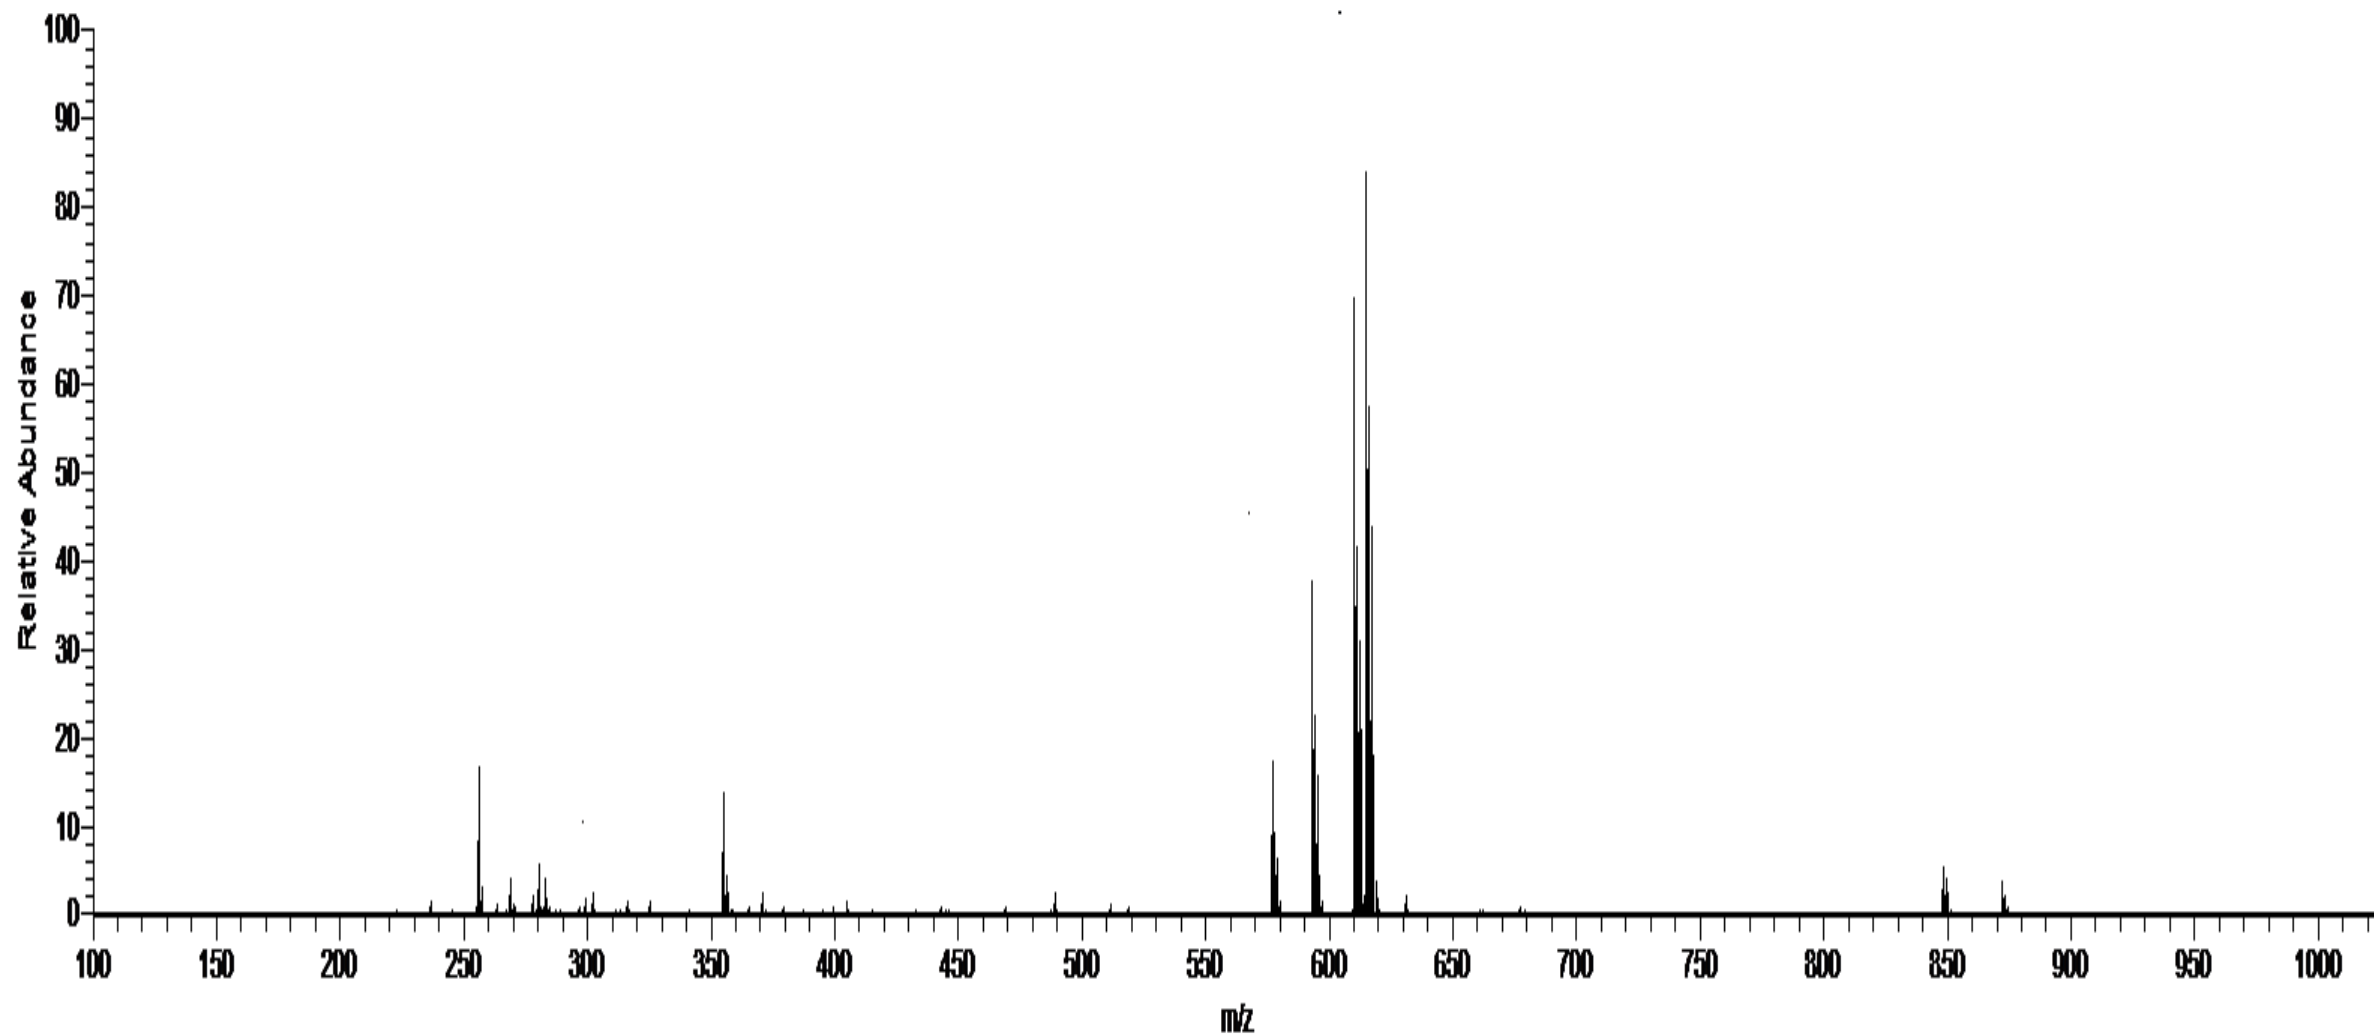

Supplement: f1 [file 6174897.f1.zip]

1-3\_200315185024 #813-822 RT:21.66-21.90 AV: 10 SB: 2 22.54 , 21.26 NL: 9.20E5

F: FTMS + p ESI Full ms [100.00-2000.00]

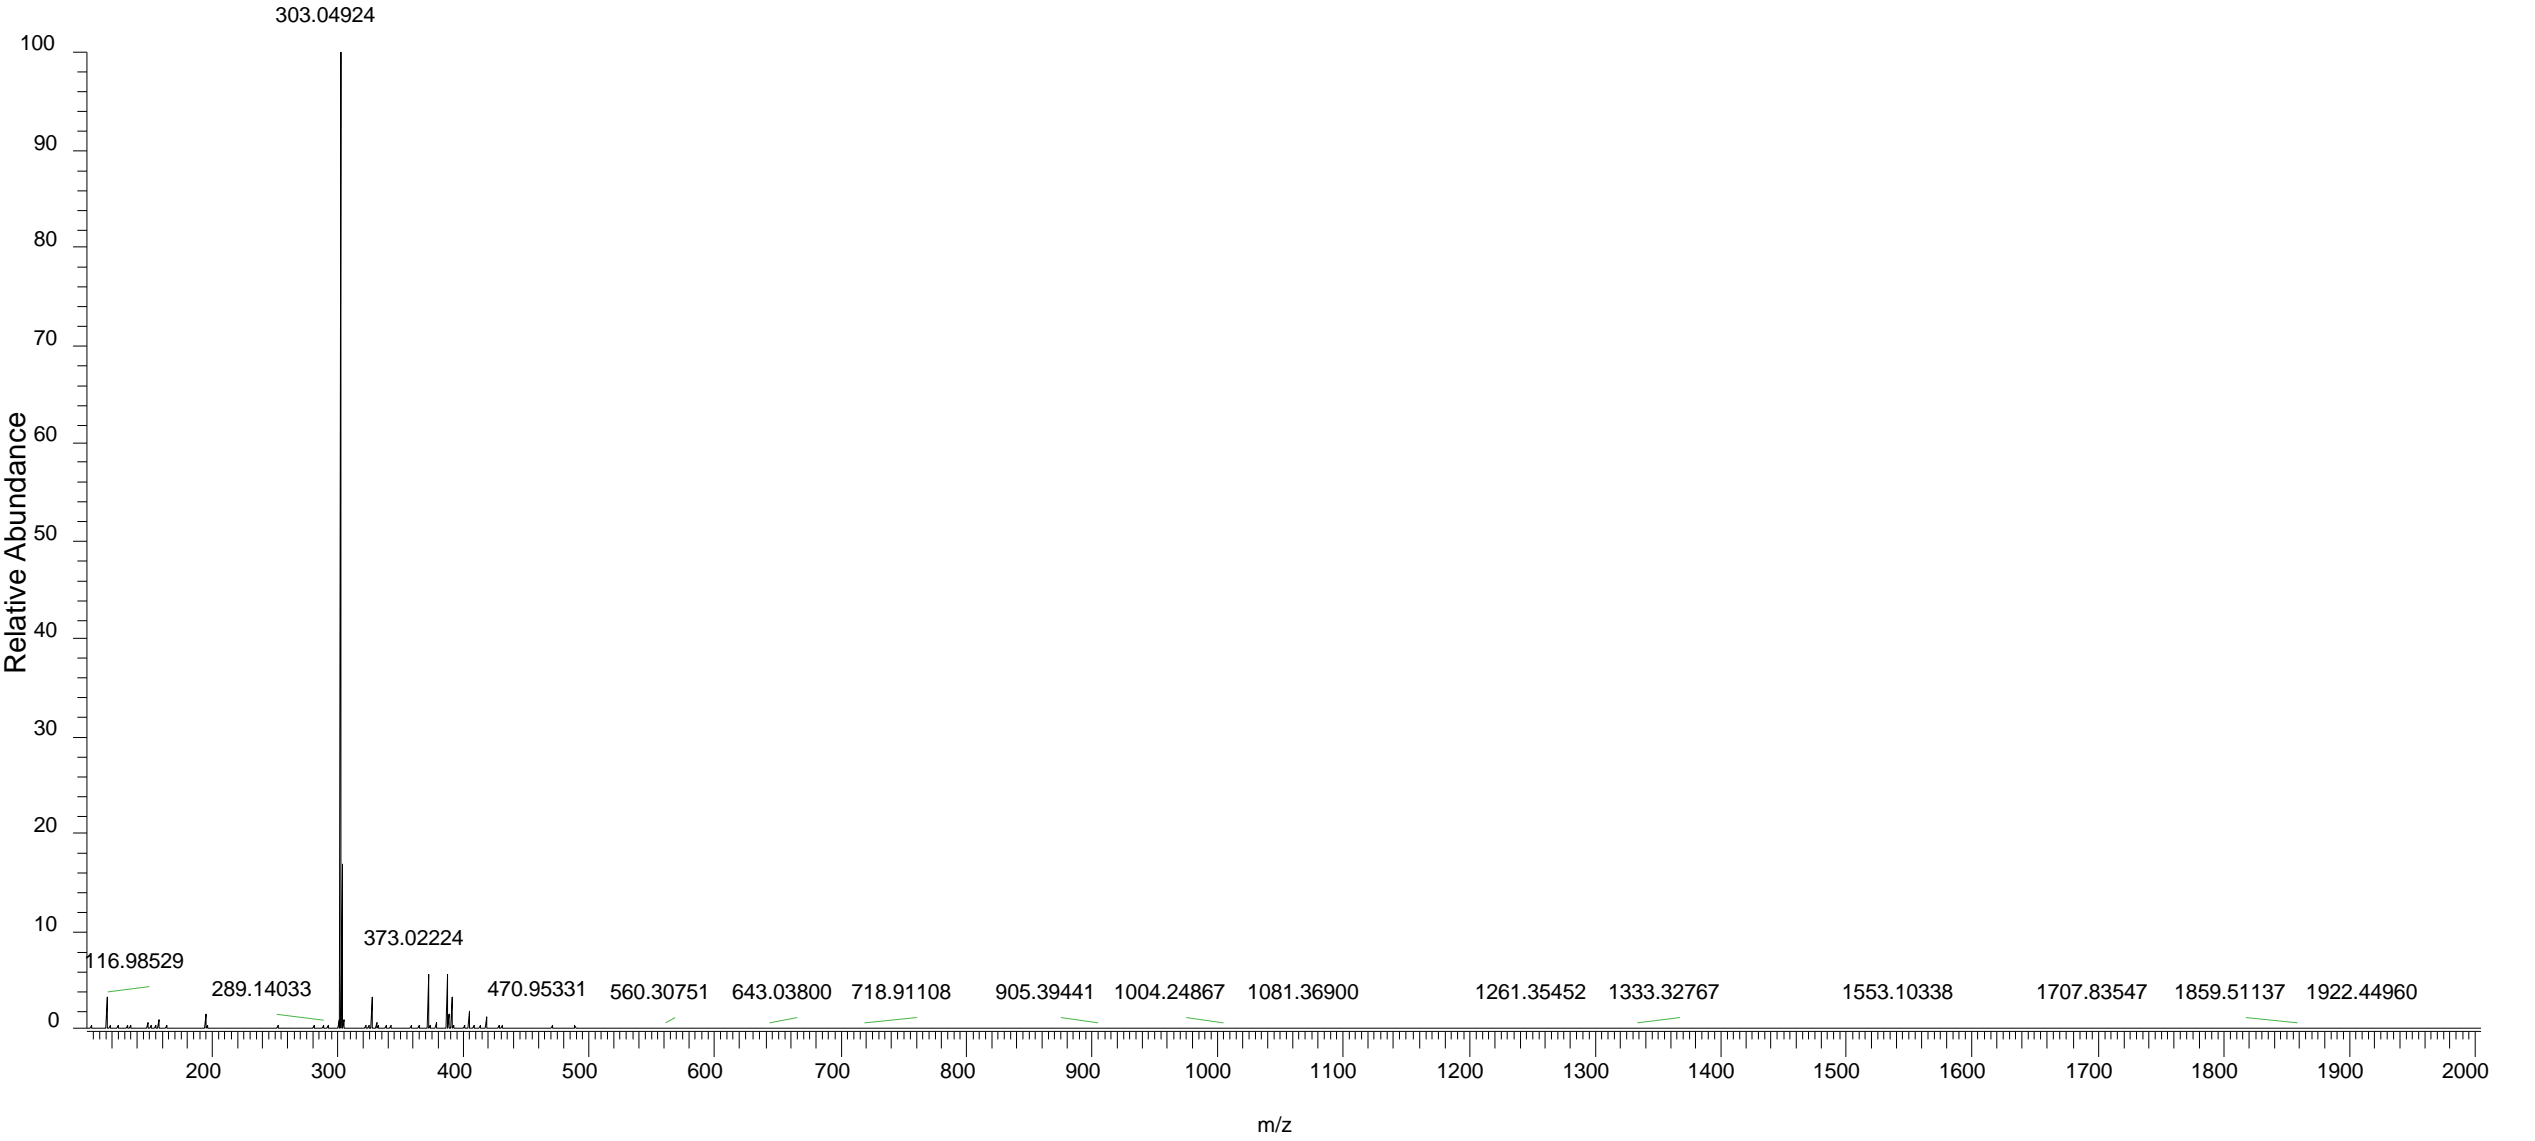

Supplement: f1 [file 6174897.f1.zip]

2-3 #760-765 RT: 20.24-20.38 AV: 6 SB: 2 23.02 , 18.96 NL: 5.60E4

T: FTMS - p ESI Full ms [100.00-2000.00]

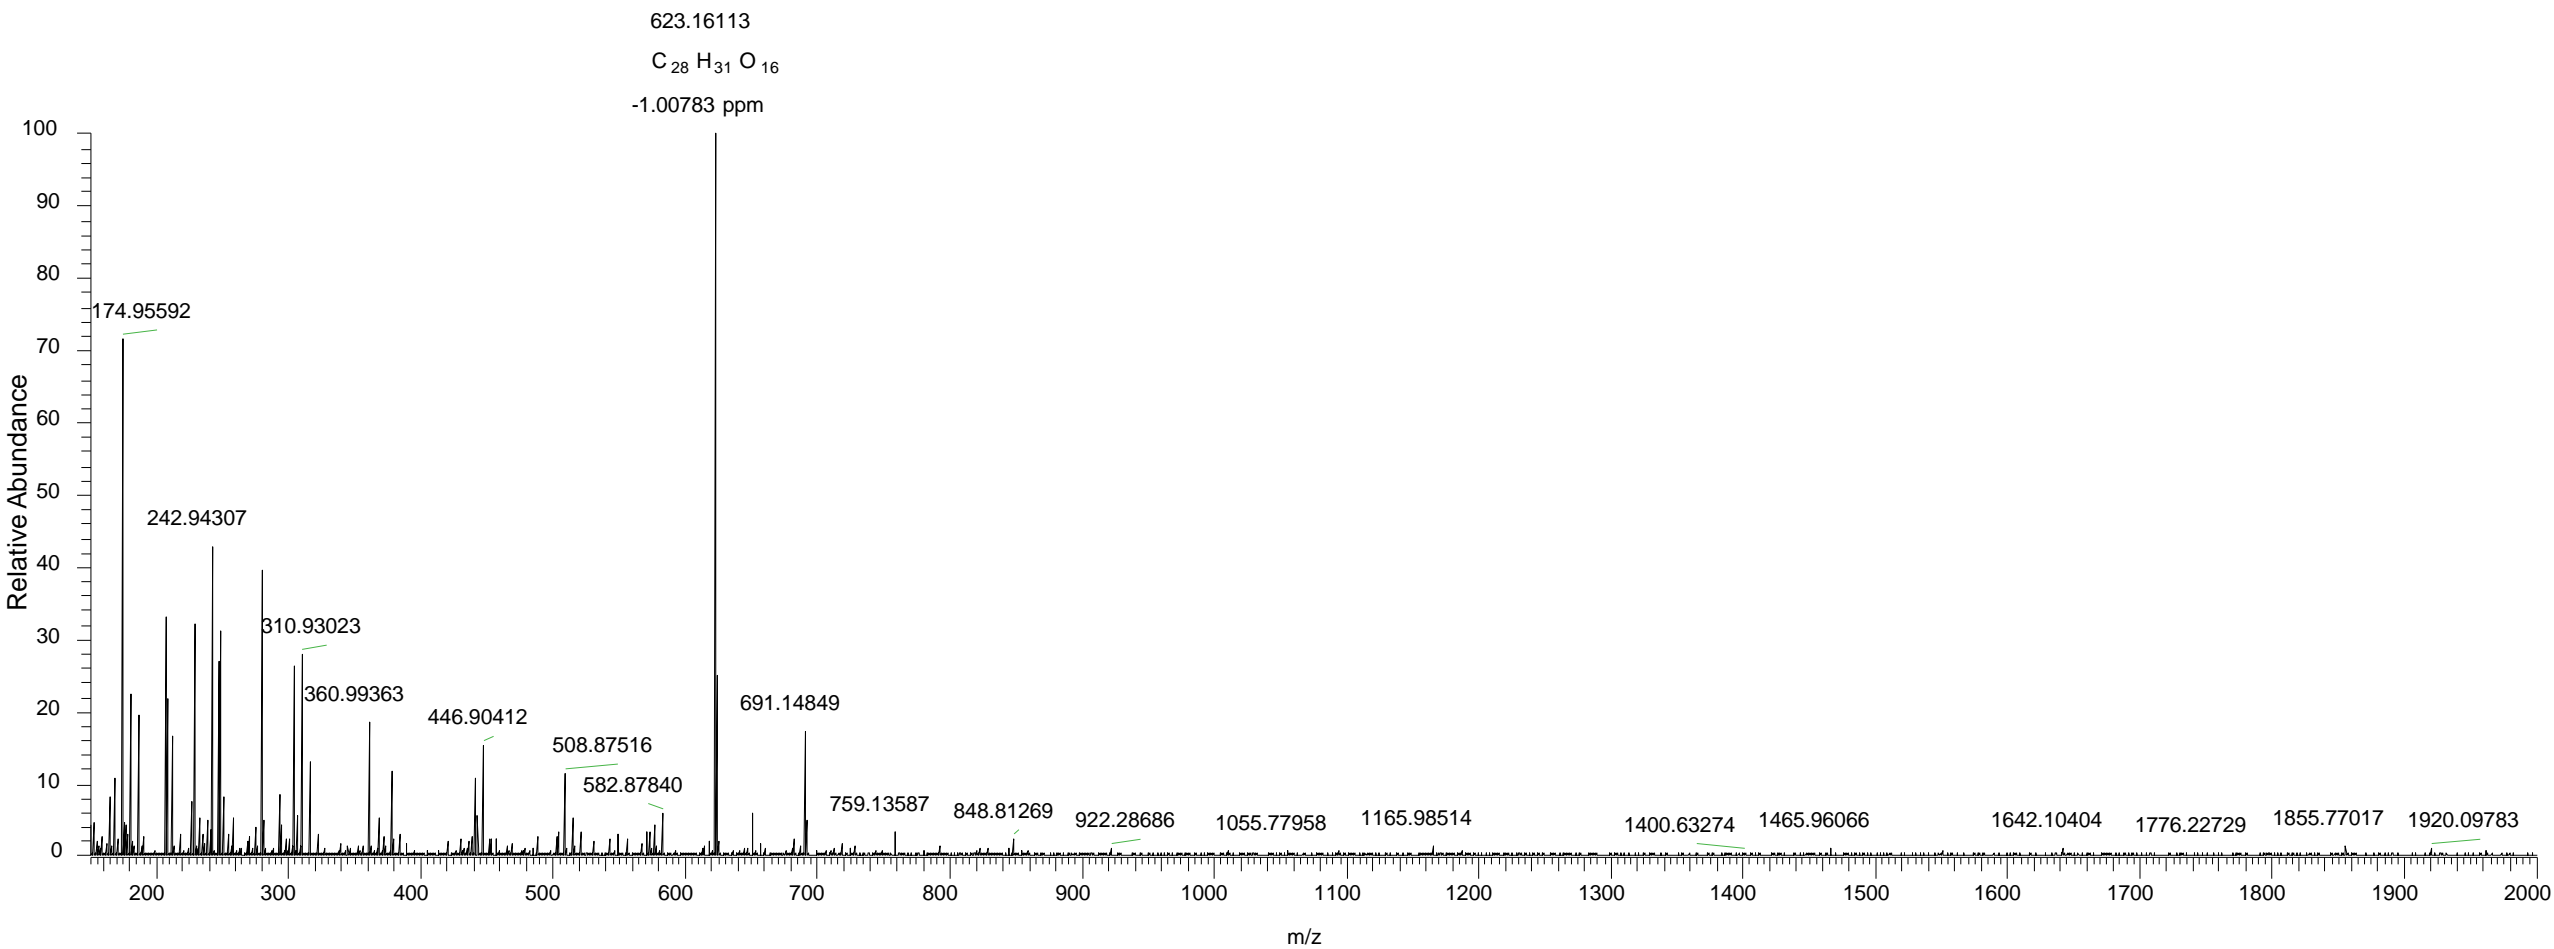

Supplement: f1 [file 6174897.f1.zip]
